# Supplementary material for: Preparation and Characterisation of UV-Curable Flame Retardant Wood Coating Containing a Phosphorus Acrylate Monomer
Source: MDPI journal article supplement (doi:10.3390/coatings12121850), 2022-11-29
Supplement: s1 [file s1]

Supplementary information

# Preparation and Characterisation of UV-Curable Flame Retardant Wood Coating Containing a Phosphorus Acrylate Monomer

Solène Pellerin <sup>1,2</sup>, Fabienne Samyn <sup>2</sup>, Sophie Duquesne <sup>2</sup> and Véronique Landry <sup>1,\*</sup>

<sup>1</sup> NSERC–Canlak Industrial Research Chair in Interior Wood-Product Finishes, Department of Wood and Forest Sciences, Université Laval, Québec City, QC G1V 0A6, Canada

<sup>2</sup> CNRS, INRAE, Centrale Lille, UMR 8207-UMET-Unité Matériaux et Transformations, Université de Lille, F-59000 Lille, France

\* Correspondence: veronic.landry@sbfi.ulaval.ca; Tel.: +1-(418)-656-2131

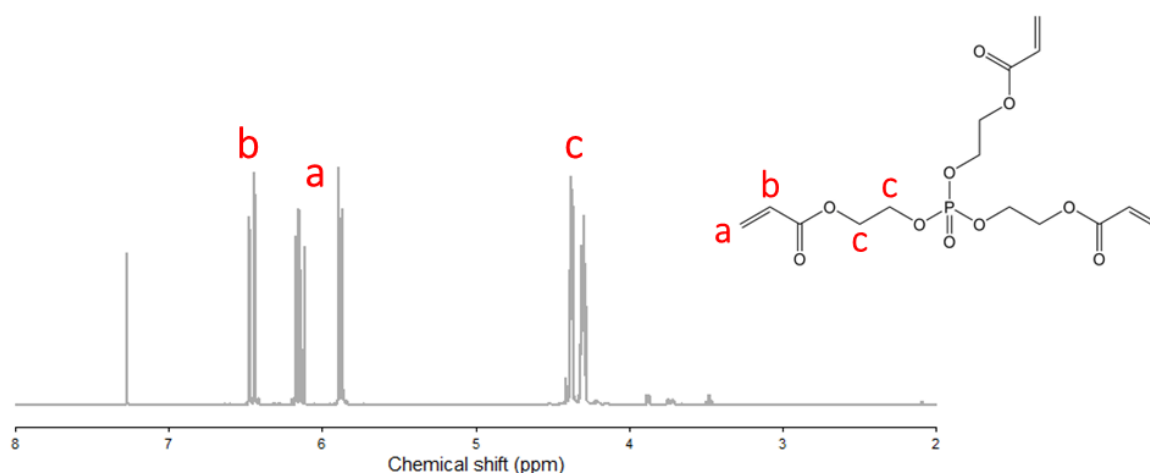

**Figure S1.** <sup>1</sup>H NMR spectrum of tri(acryloyloxyethyl) phosphate (TAEP).

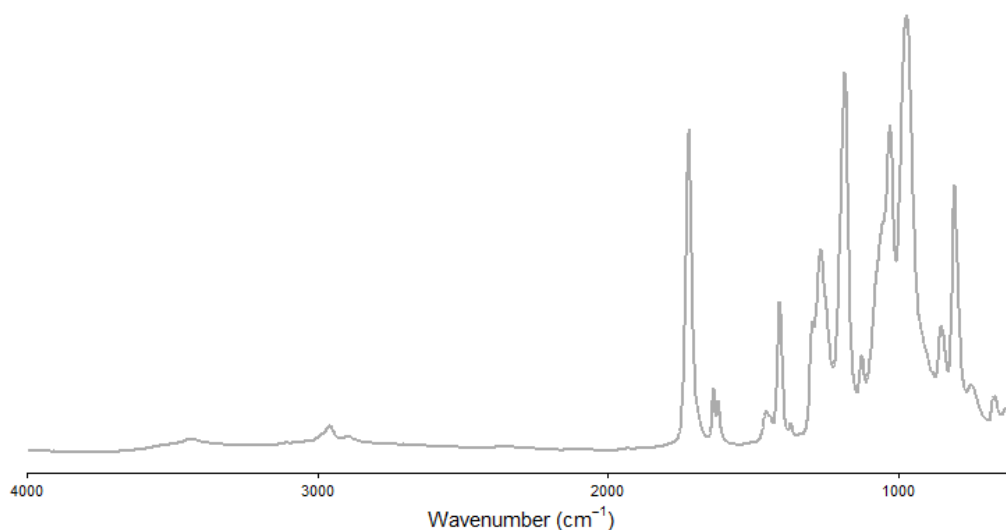

**Figure S2.** FTIR spectrum of tri(acryloyloxyethyl) phosphate (TAEP).

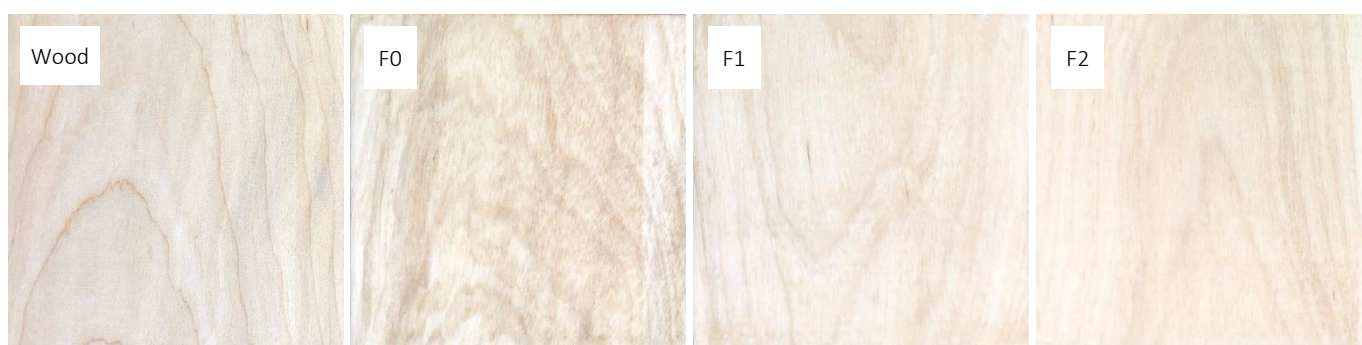

**Figure S3.** Appearance of the coatings applied on wood panels.

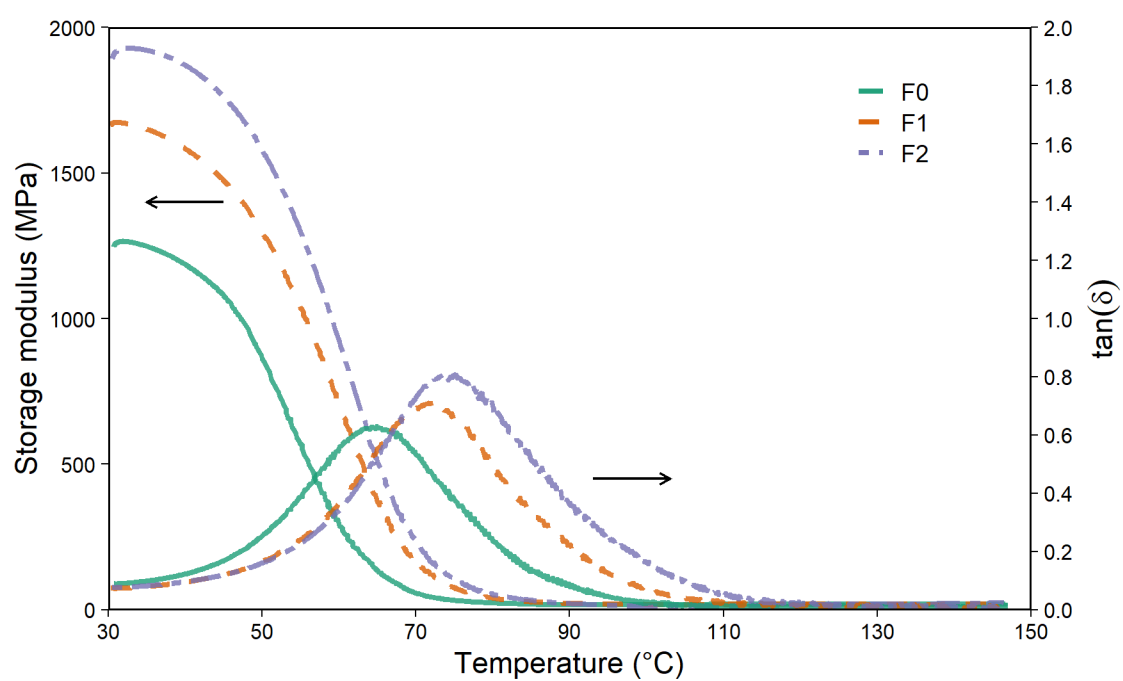

**Figure S4.** Storage modulus and  $\tan \delta$  curves resulting from DMA analysis on the coating films.
